# Supplementary material
Source: publisher figshare collection journal article supplement (https://rs.figshare.com/ndownloader/files/6330222)
Supplement: Supplementary file 1 [file 6330222]

## Sheet: Sheet1
Table S1. Samples used to determine the types of fungi associated with dermatitis in wild snakes. Location data are displayed only to the county (or sometimes state) level due to concerns with disclosing specific locations of rare or sensitive snake populations. Fungal infection was assessed by examining histologic sections of skin lesions. The number of gross lesions consistent with dermatitis w…
NWHC Case Number	Snake Species	Location	Date Collected	Sample Type	Fungal Infection	Dermatitis Lesions	Emaciated	Fungal Growth Medium	Fungal OTUs	Ophidiomyces isolated	Previous Reference
22687-01	Nerodia sipedon insularis	Ottawa County, Ohio	2009-07-20	carcass	yes	multiple	no	DTM	1	yes	none
22747-06	Nerodia sipedon insularis	Ottawa County, Ohio	2009-06-21	carcass	yes	multiple	yes	DTM	2	yes	none
23906-01	Pantherophis alleghaniensis	Passaic County, New Jersey	2012-03-13	carcass	yes	multiple	yes	DTM	1	yes	none
23913-01	Crotalus horridus	Norfolk County, Massachusetts	2012-04-07	carcass	yes	single	no	DTM	2	yes	none
23942-01	Nerodia sipedon	Norfolk County, Massachusetts	2012-04-10	carcass	yes	multiple	yes	DTM	5	yes	none
24042-01	Coluber constrictor	Dutchess County, New York	2012-07-05	carcass	yes	multiple	yes	DTM	1	yes	none
24266-02	Sistrurus miliarius barbouri	Volusia County, Florida	2012-10-18	carcass	yes	multiple	yes	DTM	6	yes	none
24266-03	Sistrurus miliarius barbouri	Volusia County, Florida	2012-10-18	carcass	yes	multiple	yes	DTM	4	yes	none
24266-05	Sistrurus miliarius barbouri	Volusia County, Florida	2012-12-15	carcass	yes	multiple	yes	DTM; SD	4	yes	none
24266-06	Coluber constrictor	Volusia County, Florida	2012-01-07	carcass	yes	multiple	yes	DTM	5	yes	none
24281-01	Lampropeltis triangulum	Westchester County, New York	2013-05-13	carcass	yes	multiple	no	DTM	4	yes	none
24393-01	Lampropeltis nigra	Jackson County, Alabama	2013-05-08	carcass	yes	multiple	no	DTM	9	yes	none
24395-01	Crotalus horridus	Fillmore County, Minnesota	2013-05-14	biopsy	yes	not assessed	not assessed	DTM	4	yes	none
24411-01	Lampropeltis triangulum	Middlesex County, Massachusetts	2013-05-31	biopsy	yes	not assessed	not assessed	DTM	3	yes	none
24412-01	Coluber constrictor	Merrimack County, New Hampshire	2013-06-03	biopsy	yes	not assessed	not assessed	DTM	1	no	none
24415-01	Agkistrodon contortrix	Spartanburg County, South Carolina	2013-04-24	carcass	yes	multiple	no	DTM	4	yes	none
24564-01	Pantherophis vulpinus	Outagamie County, Wisconsin	2013-10-02	carcass	yes	multiple	yes	DTM;SD	9	yes	none
24746-01	Crotalus horridus	Hartford County, Connecticut	2014-03-11	carcass	yes	multiple	no	DTM; SD	2	yes	none
24821-01	Python bivittatus	Monroe County, Florida	2008-11-11	carcass	yes	multiple	not assessed	DTM	3	no	none
24824-01	Lampropeltis triangulum	New Hampshire	2014-05-07	carcass	yes	multiple	no	DTM; SD	4	yes	none
24825-01	Crotalus horridus	Suffolk County, Massachusetts	2014-05-14	biopsy	yes	not assessed	not assessed	DTM	3	no	none
24825-02	Crotalus horridus	Suffolk County, Massachusetts	2014-05-14	biopsy	yes	not assessed	not assessed	DTM	2	yes	none
24826-01	Crotalus horridus	Rutland County, Vermont	2014-05-14	biopsy	yes	not assessed	not assessed	DTM; SD	4	yes	none
24826-02	Crotalus horridus	Rutland County, Vermont	2014-05-14	biopsy	yes	not assessed	not assessed	DTM; SD	5	yes	none
24828-01	Crotalus horridus	Sauk County, Wisconsin	2014-05-18	biopsy	yes	not assessed	not assessed	DTM; SD	1	yes	none
24829-01	Crotalus horridus	Grant County, Wisconsin	2014-05-18	biopsy	yes	not assessed	not assessed	DTM; SD	2	no	none
24831-01	Crotalus horridus	Rutland County, Vermont	2014-05-21	biopsy	yes	not assessed	not assessed	DTM; SD	6	yes	none
24833-01	Crotalus horridus	Houston County, Minnesota	2014-05-23	biopsy	yes	not assessed	not assessed	DTM; SD	5	yes	none
24833-02	Crotalus horridus	Houston County, Minnesota	2014-05-23	biopsy	yes	not assessed	not assessed	DTM; SD	2	yes	none
24833-03	Crotalus horridus	Houston County, Minnesota	2014-05-23	biopsy	yes	not assessed	not assessed	DTM; SD	2	yes	none
24833-04	Crotalus horridus	Houston County, Minnesota	2014-05-23	biopsy	yes	not assessed	not assessed	DTM; SD	2	no	none
24834-01	Crotalus horridus	Fillmore County, Minnesota	2014-05-23	biopsy	yes	not assessed	not assessed	DTM; SD	6	yes	none
24834-02	Crotalus horridus	Fillmore County, Minnesota	2014-05-23	biopsy	yes	not assessed	not assessed	DTM; SD	4	no	none
24840-01	Pituophis catenifer sayi	Chisago County, Minnesota	2014-05-13	biopsy	yes	not assessed	not assessed	DTM; SD	2	no	none
24852-01	Crotalus horridus	Houston County, Minnesota	2014-05-23	biopsy	yes	not assessed	not assessed	DTM;SD	5	yes	none
24852-02	Crotalus horridus	Houston County, Minnesota	2014-05-23	biopsy	yes	not assessed	not assessed	DTM; SD	3	yes	none
24852-03	Crotalus horridus	Houston County, Minnesota	2014-05-23	biopsy	yes	not assessed	not assessed	DTM; SD	3	no	none
24874-01	Crotalus horridus	Trempealeau County, Wisconsin	2014-06-16	biopsy	yes	not assessed	not assessed	DTM; SD	2	yes	none
24878-01	Nerodia taxispilota	Virginia Beach, Virginia	2014-04-04	biopsy	yes	not assessed	not assessed	DTM	1	yes	Guthrie et al., 2016
24878-02	Farancia erytrogramma	Virginia Beach, Virginia	2014-04-04	biopsy	yes	not assessed	not assessed	DTM	1	no	Guthrie et al., 2016
24878-03	Nerodia sipedon	Virginia Beach, Virginia	2014-04-04	biopsy	yes	not assessed	not assessed	DTM	0	no	Guthrie et al., 2016
24878-04	Nerodia taxispilota	Virginia Beach, Virginia	2014-04-04	biopsy	yes	not assessed	not assessed	DTM	0	no	Guthrie et al., 2016
24878-05	Coluber constrictor	Virginia Beach, Virginia	2014-04-11	biopsy	yes	not assessed	not assessed	DTM	2	yes	Guthrie et al., 2016
24878-06	Coluber constrictor	Virginia Beach, Virginia	2014-04-11	biopsy	yes	not assessed	not assessed	DTM	1	yes	Guthrie et al., 2016
24878-09	Nerodia sipedon	Virginia Beach, Virginia	2014-06-07	biopsy	yes	not assessed	not assessed	DTM	1	yes	Guthrie et al., 2016
24885-01	Crotalus horridus	Crawford County, Wisconsin	2014-06-20	biopsy	yes	not assessed	not assessed	DTM; SD	2	yes	none
24894-01	Crotalus horridus	New Hampshire	2014-06-25	biopsy	yes	not assessed	not assessed	DTM; SD	4	yes	none
24900-01	Regina septemvittata	Jessamine County, Kentucky	2014-07-02	carcass	yes	multiple	yes	DTM	5	yes	Price et al., in press
26011-01	Heterodon nasicus	Sherburne County, Minnesota	2014-05-22	biopsy	yes	not assessed	not assessed	DTM; SD	2	no	none
26011-02	Heterodon nasicus	Sherburne County, Minnesota	2014-05-22	biopsy	yes	not assessed	not assessed	DTM; SD	4	no	none
26341-01	Nerodia fasciata confluens	St. Martin Parish, Louisiana	2015-03-26	carcass	yes	multiple	yes	DTM	2	yes	Glorioso et al., 2016
26464-02	Sistrurus catenatus	Clinton County, Illinois	2015-04-14	biopsy	yes	not assessed	not assessed	DTM; SD	3	yes	none
26464-03	Sistrurus catenatus	Clinton County, Illinois	2015-04-11	biopsy	yes	not assessed	not assessed	DTM; SD	9	yes	none
26464-04	Sistrurus catenatus	Clinton County, Illinois	2015-04-02	biopsy	yes	not assessed	not assessed	DTM; SD	2	yes	none
26464-05	Sistrurus catenatus	Clinton County, Illinois	2015-04-02	biopsy	yes	not assessed	not assessed	DTM; SD	5	yes	none
26464-08	Sistrurus catenatus	Clinton County, Illinois	2015-04-20	biopsy	yes	not assessed	not assessed	DTM; SD	2	yes	none
26465-01	Crotalus horridus	Norfolk County, Massachusetts	2015-05-11	biopsy	yes	not assessed	not assessed	DTM	2	yes	none
26480-01	Pantherophis vulpinus	Outagamie County, Wisconsin	2015-05-13	carcass	yes	multiple	no	DTM; SD	10	yes	none
26500-01	Crotalus horridus	La Crosse County, Wisconsin	2015-05-21	biopsy	yes	not assessed	not assessed	DTM; SD	2	no	none
26532-01	Coluber constrictor	Trempealeau County, Wisconsin	2015-06-01	biopsy	yes	not assessed	not assessed	DTM	2	no	none
26583-02	Pantherophis alleghaniensis	Rutland County, Vermont	2015-05-29	biopsy	yes	not assessed	not assessed	DTM	2	yes	none
44736-81	Regina septemvittata	Fayette County, Kentucky	2015-04-16	carcass	yes	multiple	not assessed	DTM	1	yes	none
24230-01	Crotalus horridus	Rutland County, Vermont	2008-07-28	carcass	no	none	not assessed	DTM	0	no	none
24230-02	Crotalus horridus	Rutland County, Vermont	2009-05-10	carcass	no	none	not assessed	DTM	2	no	none
24230-03	Pantherophis alleghaniensis	Rutland County, Vermont	2011-06-08	carcass	no	none	not assessed	DTM	4	no	none
26030-01	Farancia abacura	Barnwell County, South Carolina	2014-07-14	carcass	no	none	not assessed	DTM; SD	6	no	none
44736-01	Storeria dekayi	Iowa County, Wisconsin	2012-09-29	carcass	no	none	not assessed	DTM	3	no	none
44736-02	Storeria dekayi	Iowa County, Wisconsin	2012-09-29	carcass	no	none	not assessed	DTM	3	no	none
44736-03	Storeria dekayi	Iowa County, Wisconsin	2012-09-29	carcass	no	none	not assessed	DTM	2	no	none
44736-04	Storeria dekayi	Iowa County, Wisconsin	2012-09-29	carcass	no	none	not assessed	DTM	0	no	none
44736-05	Storeria dekayi	Iowa County, Wisconsin	2012-09-29	carcass	no	none	not assessed	DTM	1	no	none
44736-06	Storeria dekayi	Iowa County, Wisconsin	2012-09-29	carcass	no	none	not assessed	DTM	2	no	none
44736-07	Thamnophis sirtalis	Iowa County, Wisconsin	2012-09-29	carcass	no	none	not assessed	DTM	4	no	none
44736-19	Diadophis punctatus edwardsii	Morris County, New Jersey	January 2013	carcass	no	none	not assessed	DTM; SD	2	no	none
44736-20	Diadophis punctatus edwardsii	Morris County, New Jersey	January 2013	carcass	no	none	not assessed	DTM; SD	1	no	none
44736-21	Pantherophis alleghaniensis	Morris County, New Jersey	2013-02-27	carcass	no	none	not assessed	DTM; SD	6	no	none
44736-22	Coluber constrictor	Morris County, New Jersey	2013-02-27	carcass	no	none	not assessed	DTM; SD	8	no	none
44736-23	Pantherophis alleghaniensis	Morris County, New Jersey	2013-01-18	carcass	no	none	not assessed	DTM; SD	7	no	none
44736-43	Pituophis catenifer sayi	Sherburne County, Minnesota	2012-10-15	carcass	no	none	not assessed	DTM; SD	14	no	none
44736-63	Lampropeltis triangulum	Iowa County, Wisconsin	September 2014	carcass	no	none	not assessed	DTM; SD	9	no	none
44736-64	Coluber constrictor	Iowa County, Wisconsin	August 2014	carcass	no	none	not assessed	DTM; SD	9	no	none
44736-85	Regina septemvittata	Jessamine County, Kentucky	2015-05-25	carcass	no	none	not assessed	DTM	2	no	none
